# Supplementary material for: Reversible crystal-to-crystal transformation in nano-porous three-dimensional lead(ii) MOFs; study of solvent attendance on iodide adsorption affinity
Source: Royal Society of Chemistry journal article supplement (doi:10.1039/c2ce26056e), 2012-01-01
Supplement: c2ce26056e.pdf [file c2ce26056e.pdf]

**Electronic Supplementary Information for MS:**

**Reversible Crystal-to-Crystal Transformation in Nano-porous Three-dimensional Lead(II) MOFs; Study of Solvent Attendance on Iodide Adsorption Affinity**

**Lida Hashemi, Ali Morsali\***

<sup>a</sup>Department of Chemistry, Faculty of Sciences, Tarbiat Modares University, P.O. Box 14115-175, Tehran, Islamic Republic of Iran

a)

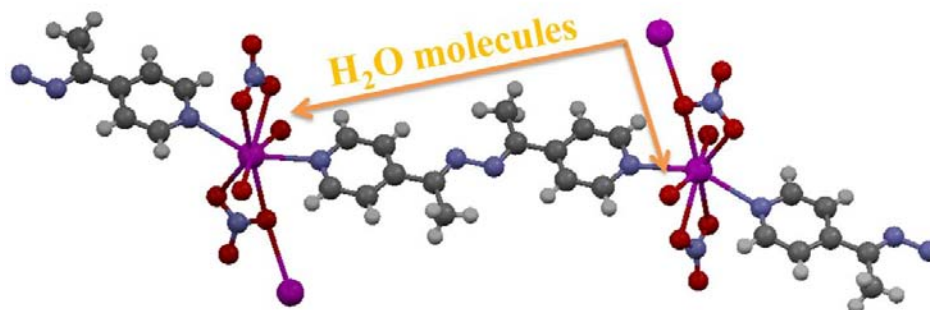

b)

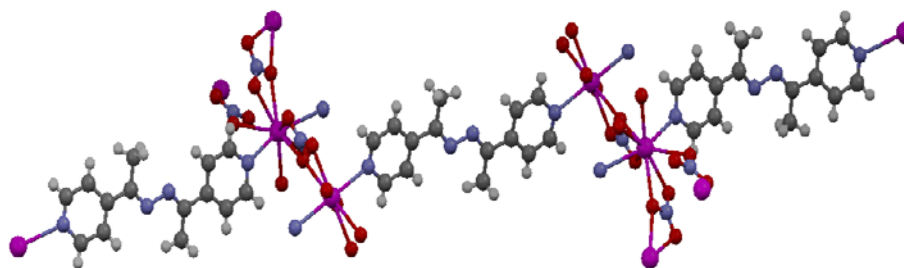

**Figure S1.** ORTEP diagram of the a) compound  $[\text{Pb}(4\text{-bpdh})(\text{NO}_3)_2(\text{H}_2\text{O})]_n$  (**HMTI-1**) and b) compound  $[\text{Pb}(4\text{-bpdh})(\text{NO}_3)_2]_n$  (**HMTI-2**)

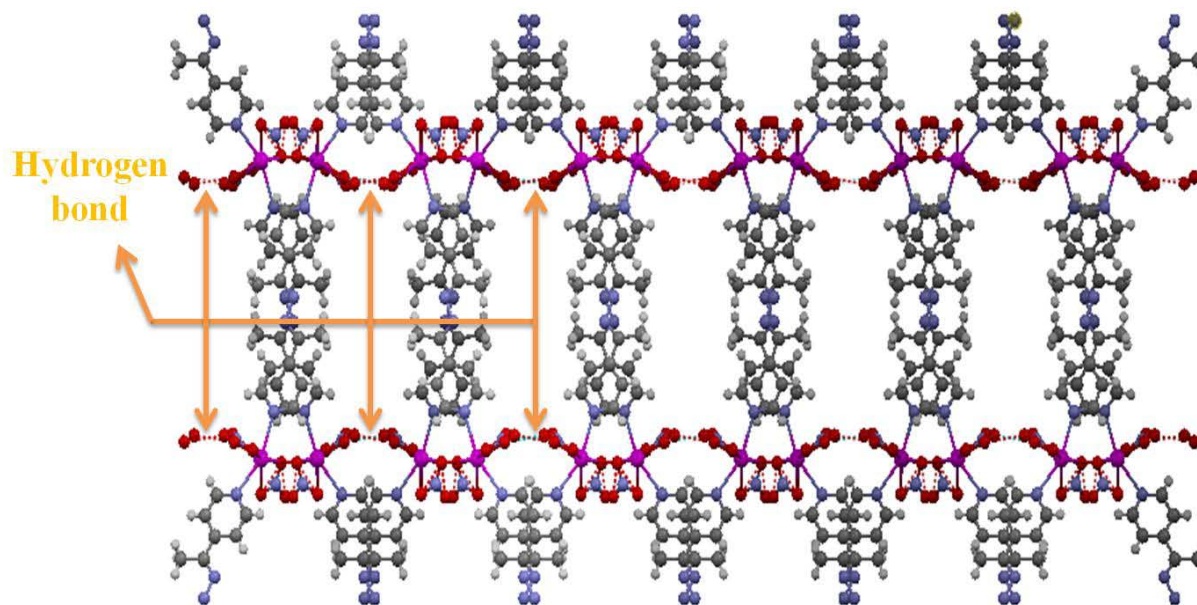

**Figure S2.** A schematic diagram illustrating the interactions in polymeric chains of compound (**HMTI-1**), H atoms have been omitted for clarity. (Pb= violet, O = red, C = gray and N= blue)

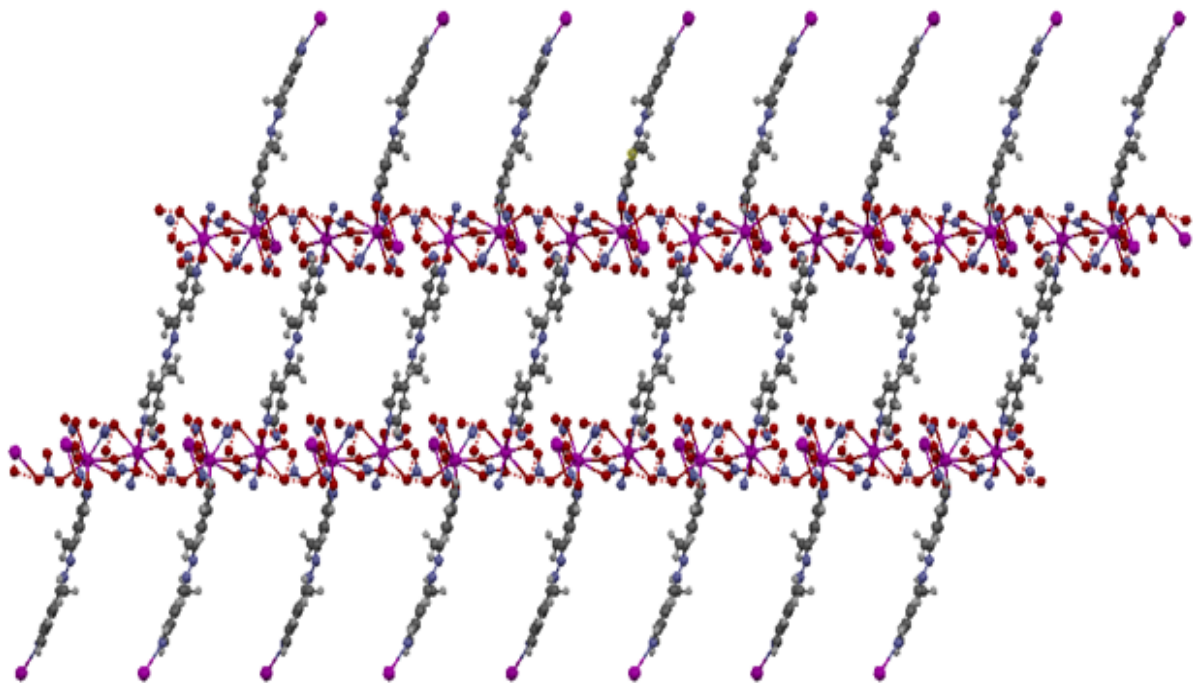

**Figure S3.** A schematic diagram illustrating the interactions in polymeric chains of compound (**HMTI-2**), H atoms have been omitted for clarity. (Pb= violet, O = red, C = gray and N= blue)

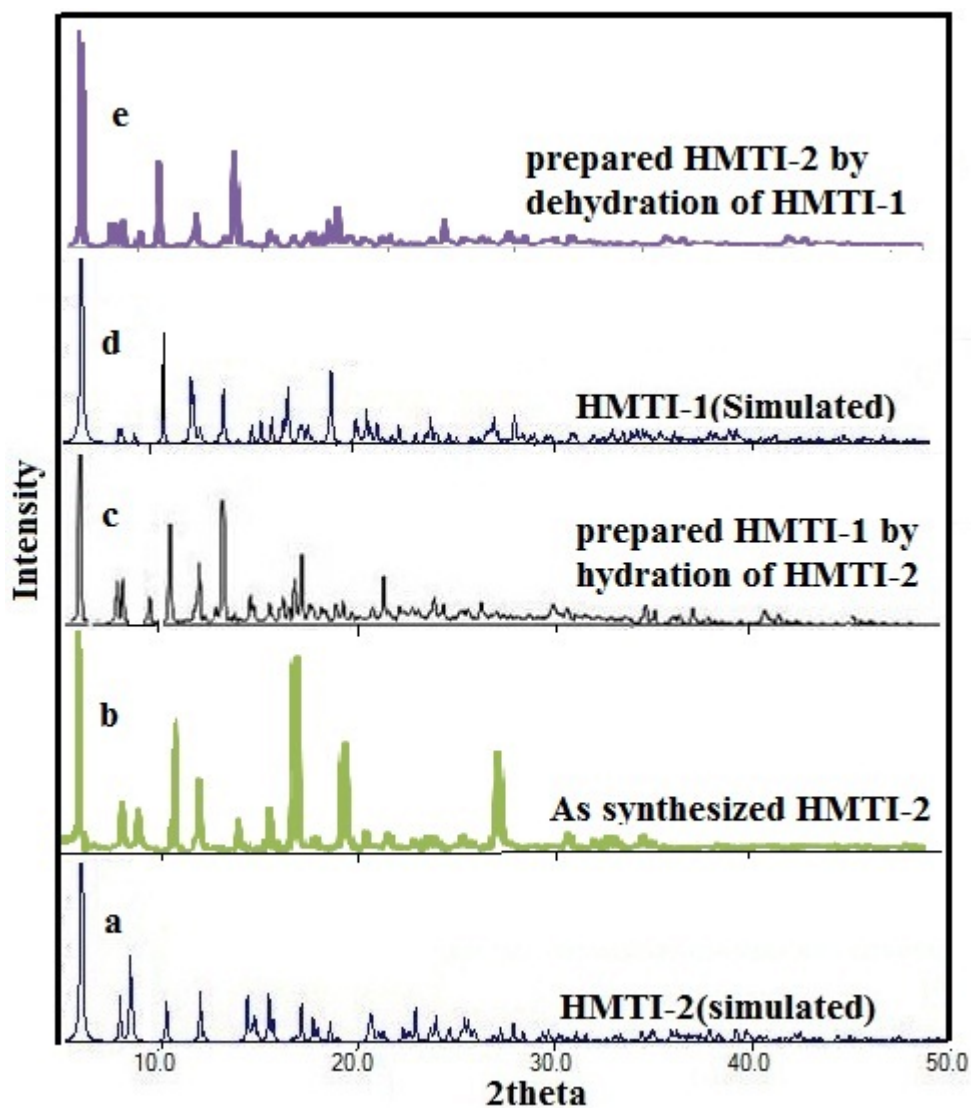

**Figure S4.** The XRD patterns of (a) simulated from single crystal X-ray data of compound **HMTI-2**; (b) bulk materials as synthesized **HMTI-2**; (c) bulk materials obtained by hydration of compound **HMTI-2**; (d) simulated from single crystal X-ray data of compound **HMTI-1** and (e) bulk materials obtained by dehydration of compound **HMTI-1**.

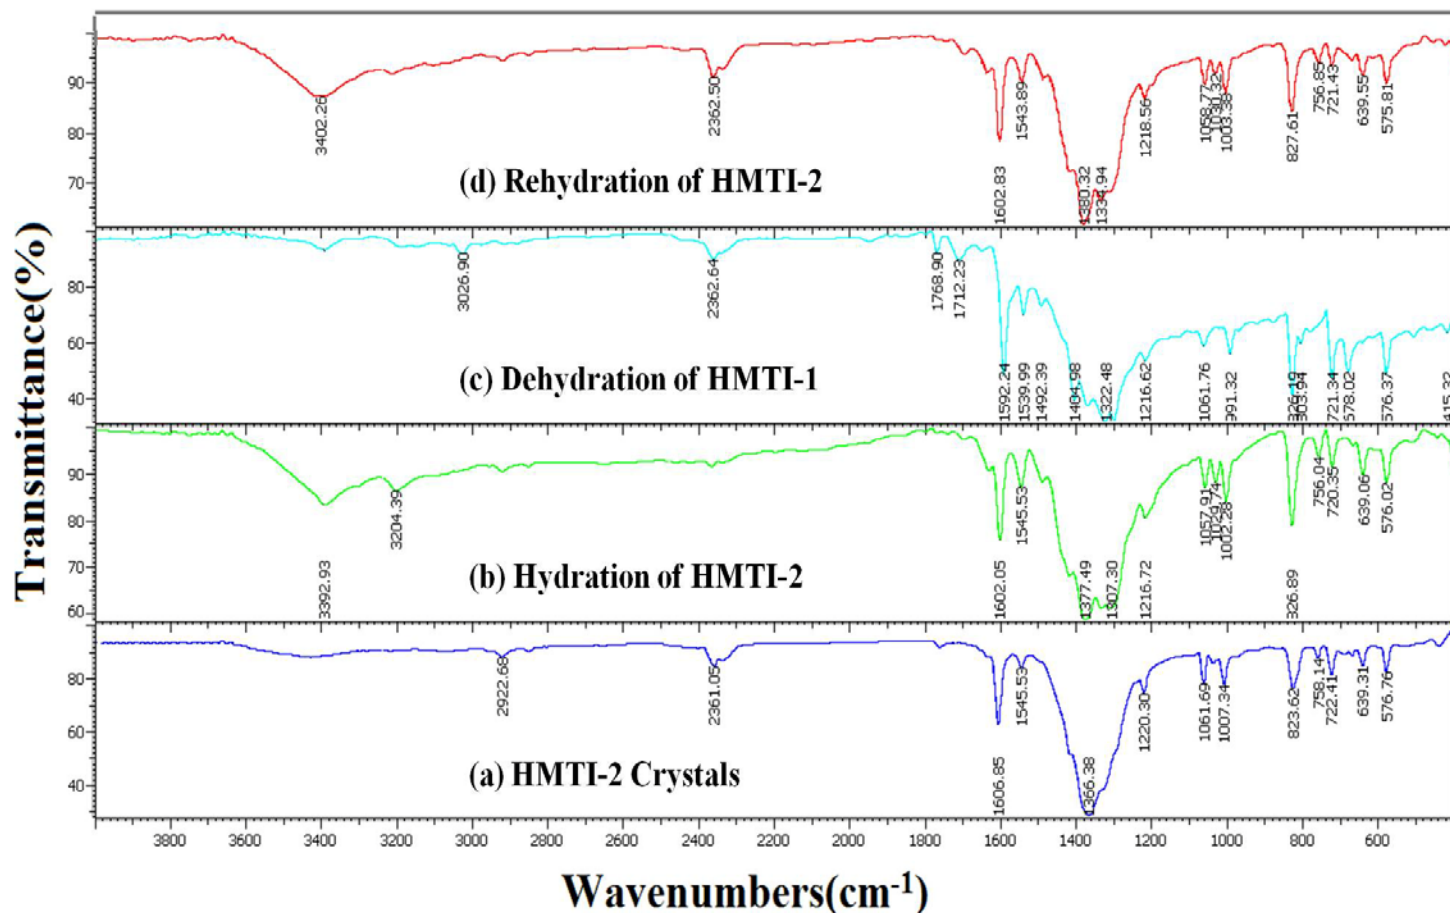

**Figure S5.** IR spectra of **a)** compound **HMTI-2**, **b)** bulk materials obtained by hydration of compound **HMTI-2** by dispersion of the compound **HMTI-2** **c)** the species obtained by heating of compound **HMTI-1** prepared by hydration of compound **HMTI-2** and **d)** compound **HMTI-1** prepared by rehydration of compound **HMTI-2** prepared by dehydration of compound **HMTI-1**.

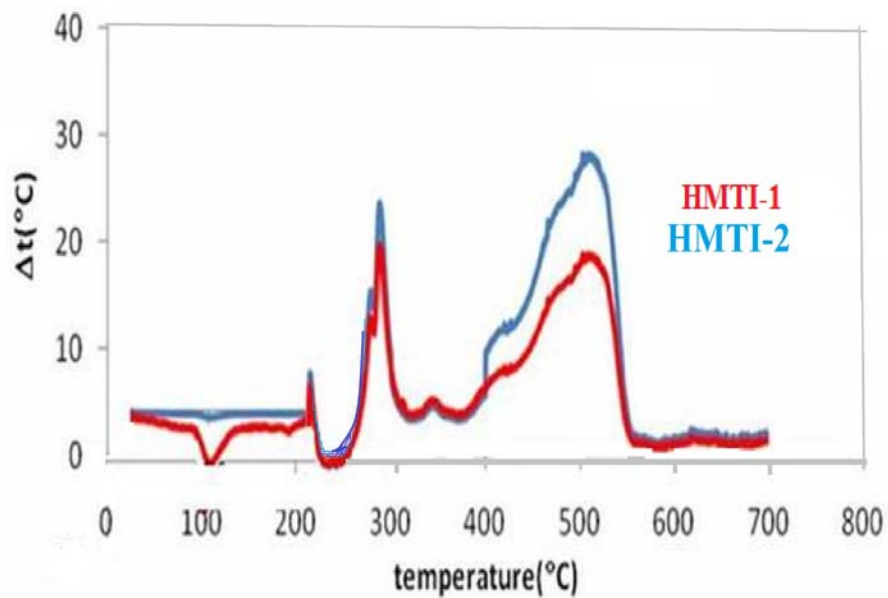

**Figure S6.** DTA diagrams of compounds **HMTI-1** and **HMTI-2**.

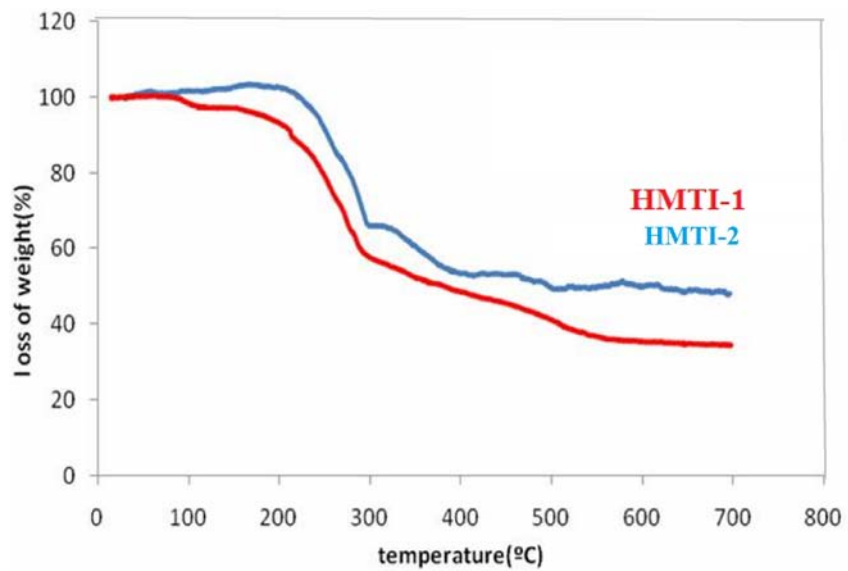

**Figure S7.** TGA diagrams of compounds **HMTI-1** and **HMTI-2**.



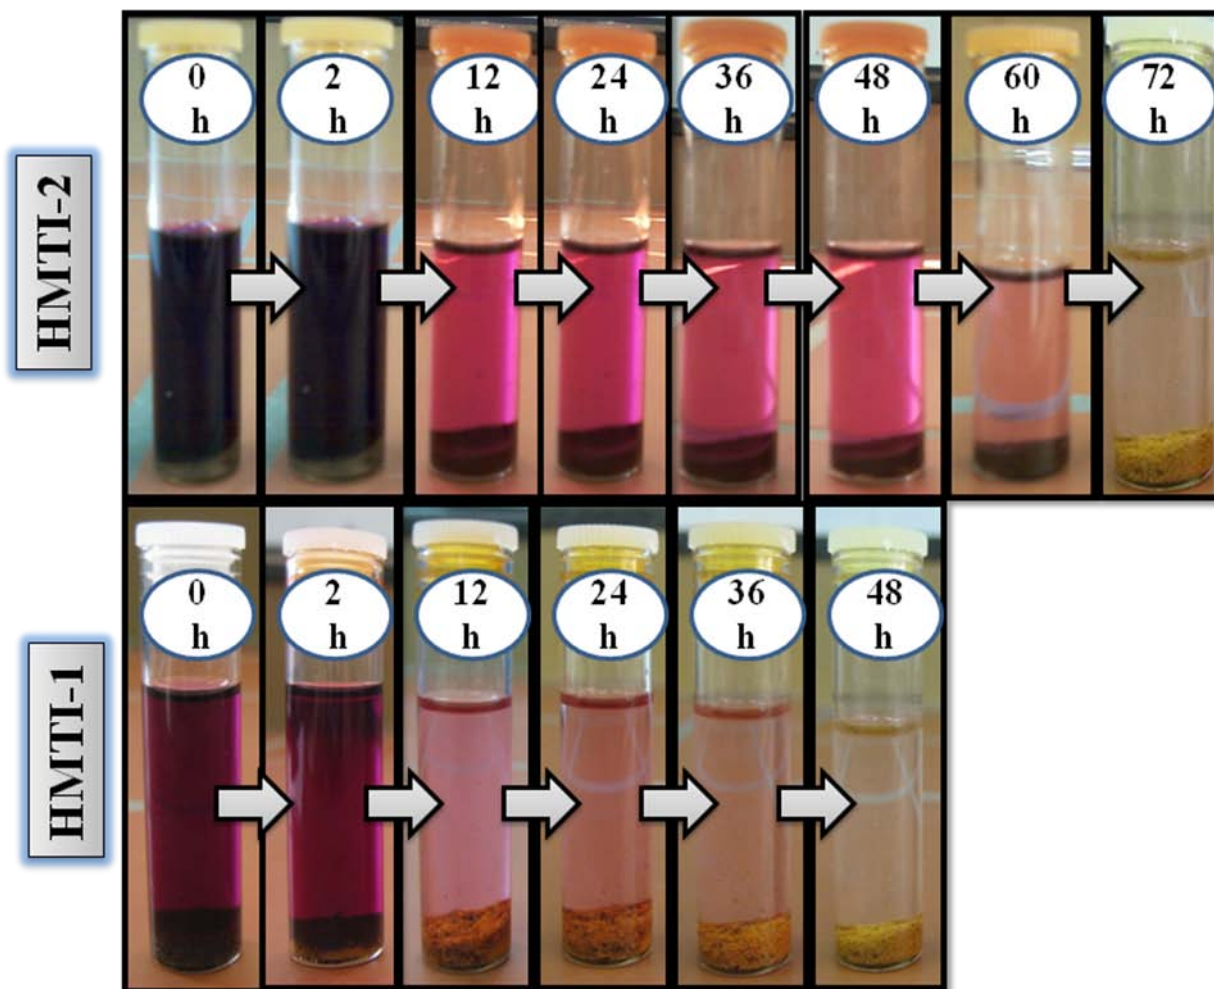

**Figure S8.** Comparison of I<sub>2</sub> enrichment progress between **HMTI-2** and **HMTI-1** when 100 mg of crystals were soaked in 3 mL of a cyclohexane solution of I<sub>2</sub> (0.1 M/L).

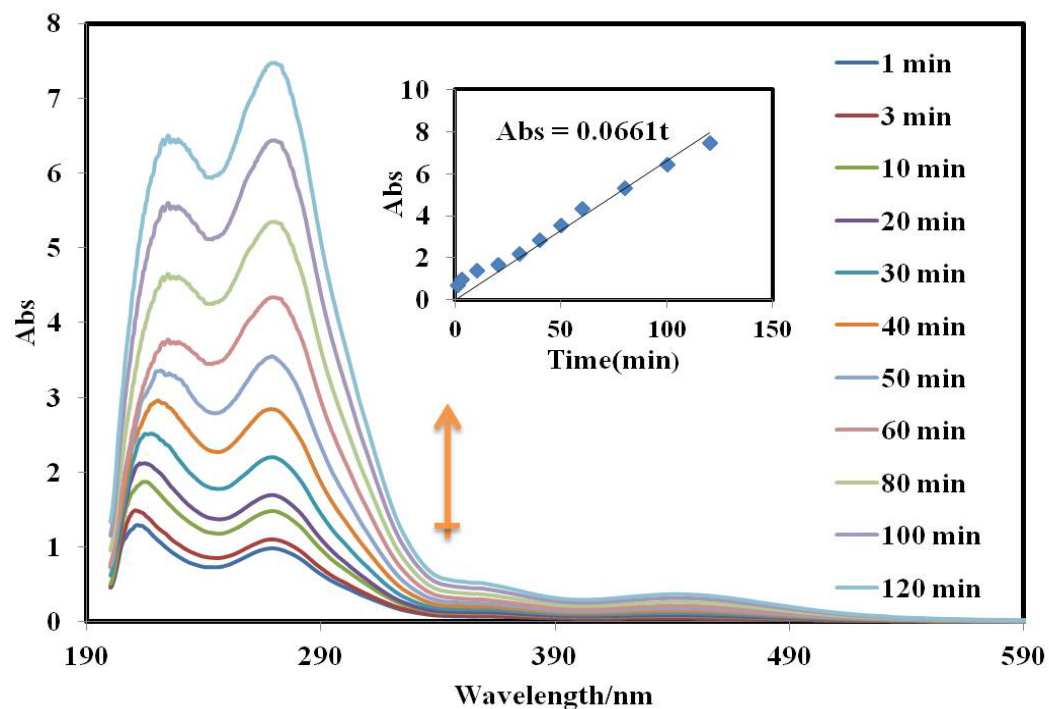

**Figure S9.** Temporal evolution of UV/vis absorption spectra for the delivery of  $I_2$  from HMTI-2 in the first 2 h.

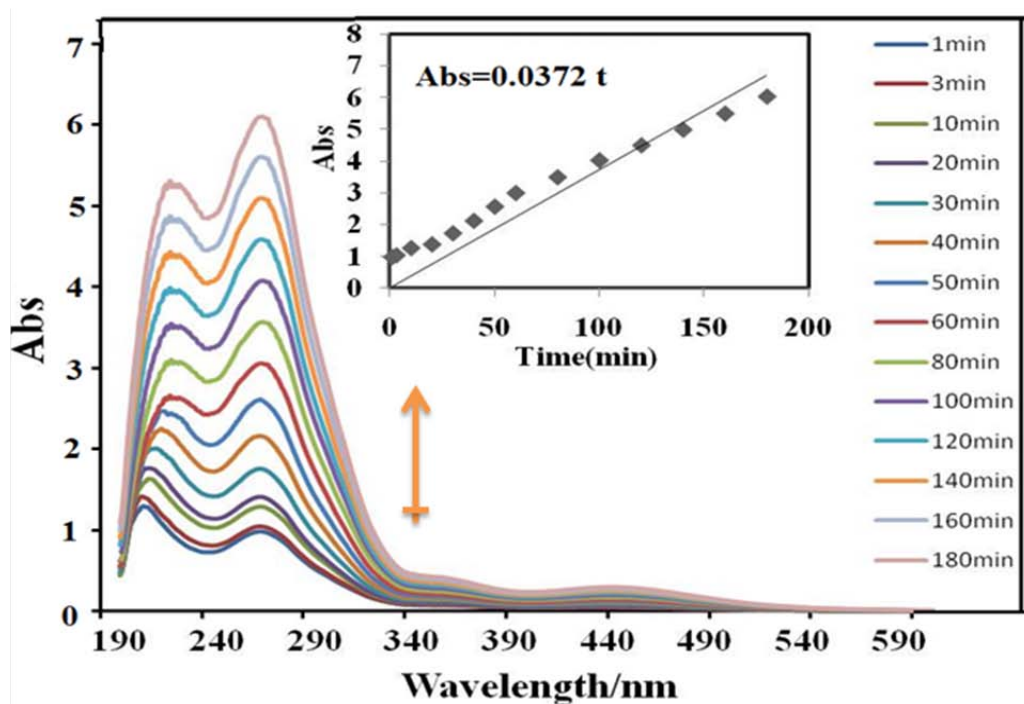

**Figure S10.** Temporal evolution of UV/vis absorption spectra for the delivery of  $I_2$  from HMTI-1 in the first 3 h.



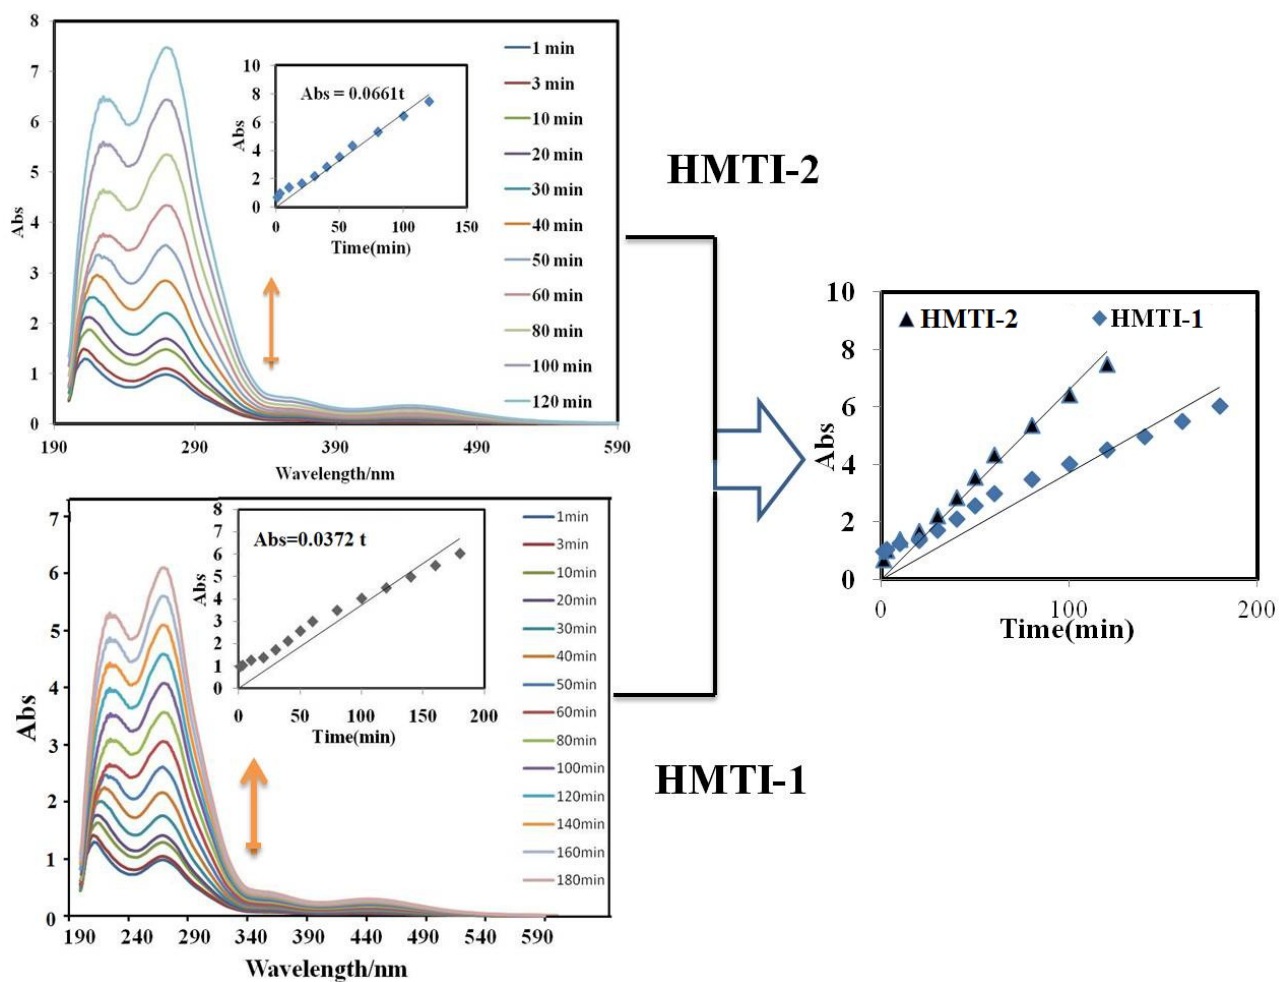

**Figure S11.** Comparison of desorbed rate of **HMTI-1** and **HMTI-2**.

**Table S1** Crystal data and structure refinement of [Pb(4-bpdh)(NO<sub>3</sub>)<sub>2</sub>] (**HMTI-2**).

|                                   |                                                                    |
|-----------------------------------|--------------------------------------------------------------------|
| Identification code               | <b>HMTI-2</b>                                                      |
| Empirical formula                 | C <sub>15</sub> H <sub>16</sub> N <sub>6.6</sub> O <sub>6</sub> Pb |
| Formula weight                    | 596.88                                                             |
| Temperature(K)                    | 120(2)                                                             |
| Wavelength                        | 0.71073                                                            |
| Crystal system                    | Monoclinic                                                         |
| Space group                       | C2/c                                                               |
| Unit cell dimensions              | a = 30.9991(10) Å                                                  |
|                                   | b = 10.1021(4) Å                                                   |
|                                   | c = 20.4318(8) Å                                                   |
|                                   | β = 110.727(3)°                                                    |
| Volume                            | 5984.2(4) Å <sup>3</sup>                                           |
| Z                                 | 4                                                                  |
| Density (calculated)              | 1.987 g/m <sup>3</sup>                                             |
| F(000)                            | 3416                                                               |
| Theta range for data collection   | 2.10 to 29.16 °                                                    |
| Index ranges                      | -42 ≤ h ≤ 32                                                       |
|                                   | -13 ≤ k ≤ 11                                                       |
|                                   | -27 ≤ l ≤ 27                                                       |
| Reflections collected             | 8045                                                               |
| Independent reflections           | 5075                                                               |
| Absorption correction             | Integration                                                        |
| Refinement method                 | F <sup>2</sup> > 2σ(F <sup>2</sup> )                               |
| Data / restraints / parameters    | 8045 / 0 / 394                                                     |
| Goodness-of-fit on F <sup>2</sup> | 1.114                                                              |
| Final R indices [I > 2σ(I)]       | R <sub>1</sub> = 0.1076 and wR <sub>2</sub> = 0.2029               |
| R Indices (all data)              | R <sub>1</sub> = 0.1702 and wR <sub>2</sub> = 0.2286               |
